# Supplementary material for: Fluorescent phenanthroimidazoles functionalized with heterocyclic spacers: synthesis, optical chemosensory ability and two-photon absorption (TPA) properties
Source: Royal Society of Chemistry journal article supplement (doi:10.1039/c7nj02113e), 2017-01-01
Supplement: c7nj02113e1.pdf [file c7nj02113e1.pdf]

**Fluorescent phenanthroimidazoles functionalized with heterocyclic spacers:  
synthesis, optical chemosensory ability and Two-Photon Absorption (TPA)  
properties**

Rosa Cristina M. Ferreira, Susana P. G. Costa, Hugo Gonçalves, Michael Belsley, and  
Maria Manuela M. Raposo

**New Journal of Chemistry**

**Electronic Supplementary Information**

1. Photos of colour changes of compound **7c** after interaction with anions and cations in ACN and ACN/H<sub>2</sub>O (95:5) p. 1
2. Quenching efficiency for compounds **5b-c**, **6a** and **7a-c** in the presence of different ions p. 1
3. Proposed mode of interaction of compound **7a** with F<sup>-</sup>, Cu<sup>2+</sup> and Fe<sup>3+</sup> p. 4

1. Photos of colour changes of compound 7c after interaction with anions and cations in ACN and ACN/H<sub>2</sub>O (95:5)

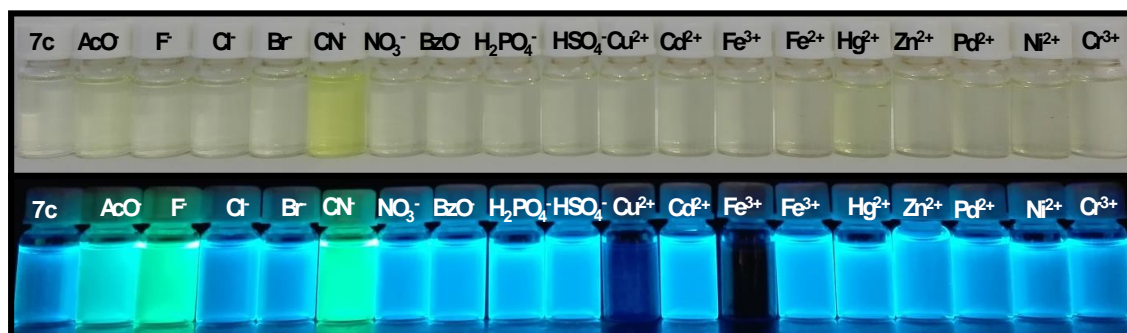

**Figure S1:** Colour changes and fluorescence changes of compound **7c** ( $10^{-4}$  M in ACN) in the presence of 50 equiv. of AcO<sup>-</sup>, F<sup>-</sup>, Cl<sup>-</sup>, Br<sup>-</sup>, CN<sup>-</sup>, NO<sub>3</sub><sup>-</sup>, BzO<sup>-</sup>, H<sub>2</sub>PO<sub>4</sub><sup>-</sup>, HSO<sub>4</sub><sup>-</sup>, Cu<sup>2+</sup>, Cd<sup>2+</sup>, Fe<sup>3+</sup>, Fe<sup>2+</sup>, Hg<sup>2+</sup>, Zn<sup>2+</sup>, Pd<sup>2+</sup>, Ni<sup>2+</sup> and Cr<sup>3+</sup> (in the form of tetrafluorborate or perchlorate salts).

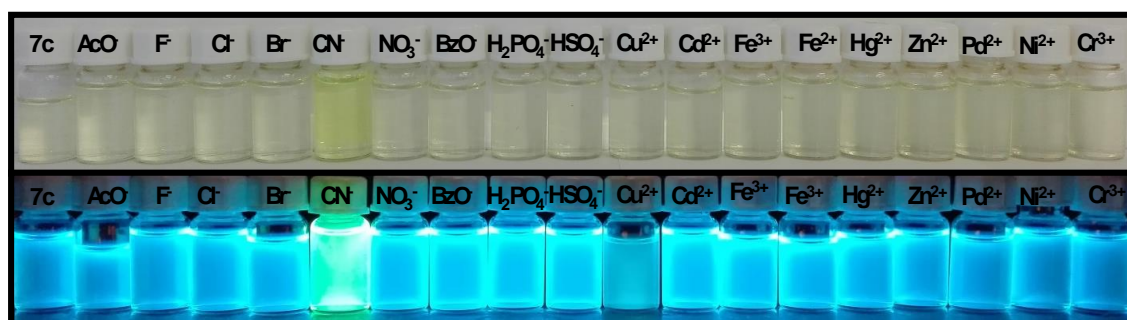

**Figure S2:** Colour changes and fluorescence changes of compound **7c** ( $10^{-4}$  M in ACN/H<sub>2</sub>O (95:05)) in the presence of 50 equiv. of AcO<sup>-</sup>, F<sup>-</sup>, Cl<sup>-</sup>, Br<sup>-</sup>, CN<sup>-</sup>, NO<sub>3</sub><sup>-</sup>, BzO<sup>-</sup>, H<sub>2</sub>PO<sub>4</sub><sup>-</sup>, HSO<sub>4</sub><sup>-</sup>, Cu<sup>2+</sup>, Cd<sup>2+</sup>, Fe<sup>3+</sup>, Fe<sup>2+</sup>, Hg<sup>2+</sup>, Zn<sup>2+</sup>, Pd<sup>2+</sup>, Ni<sup>2+</sup> and Cr<sup>3+</sup> (in the form of tetrafluorborate or perchlorate salts).

2. Quenching efficiency for compounds 5a-c, 6a-b and 7a-c in the presence of different ions

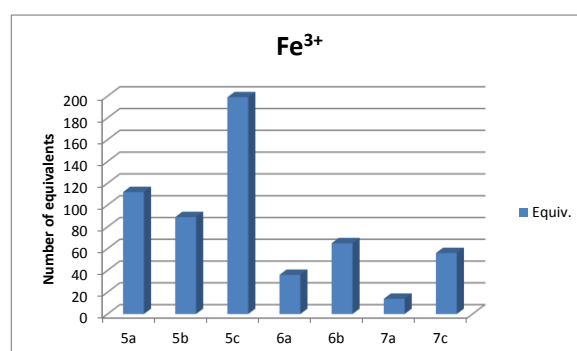

**Figure S3:** Number of equivalents necessary to quench at least 90% of the initial fluorescence intensity of each phenanthroimidazole in ACN solution in the presence of Fe<sup>3+</sup>.

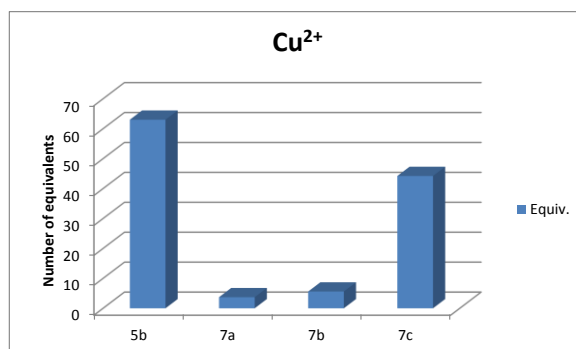

**Figure S4:** Number of equivalents necessary to quench at least 90% of the initial fluorescence intensity of each phenanthroimidazole in ACN solution in the presence of  $\text{Cu}^{2+}$ .

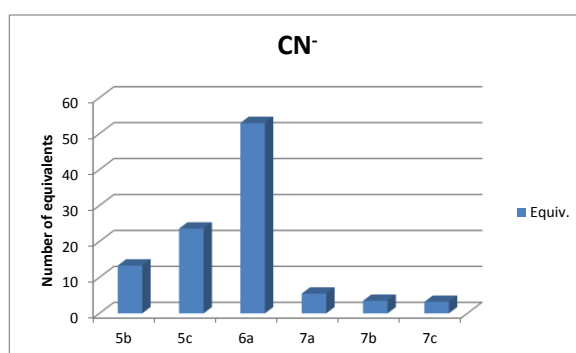

**Figure S5:** Number of equivalents necessary to quench at least 90% of the initial fluorescence intensity of each phenanthroimidazole in ACN solution in the presence of  $\text{CN}^-$ .

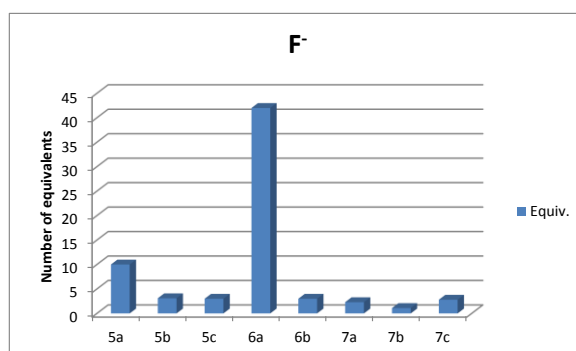

**Figure S6:** Number of equivalents necessary to quench at least 90% of the initial fluorescence intensity of each phenanthroimidazole in ACN solution in the presence of  $\text{F}^-$ .

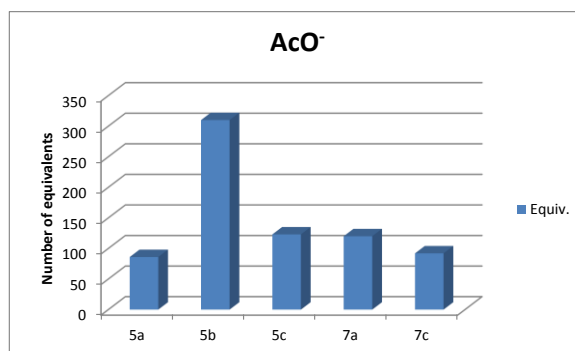

**Figure S7:** Number of equivalents necessary to quench at least 90% of the initial fluorescence intensity of each phenanthroimidazole in ACN solution in the presence of AcO<sup>-</sup>.

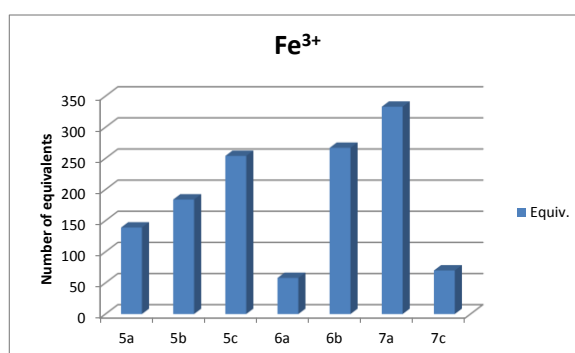

**Figure S8:** Number of equivalents necessary to quench at least 90% of the initial fluorescence intensity of each phenanthroimidazole in ACN/H<sub>2</sub>O (95:5) solution in the presence of Fe<sup>3+</sup>.

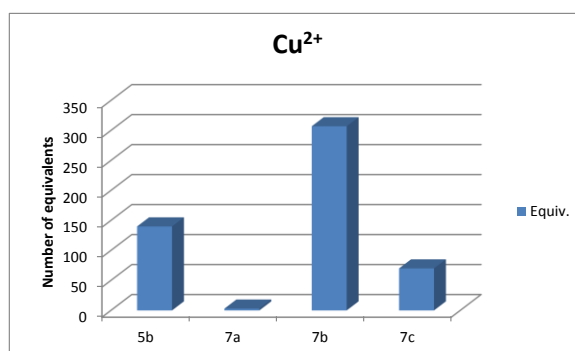

**Figure S9:** Number of equivalents necessary to quench at least 90% of the initial fluorescence intensity of each phenanthroimidazole in ACN/H<sub>2</sub>O (95:5) solution in the presence of Cu<sup>2+</sup>.

### 3. Proposed mode of interaction of compound **7a** with $F^-$ , $Cu^{2+}$ and $Fe^{3+}$

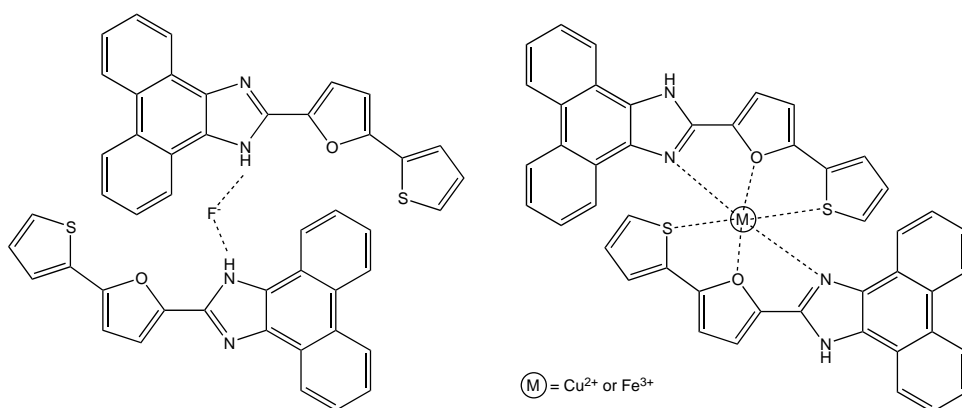

**Figure S10:** Proposed structures of the complexes between compound **7a** (as representative example of the ligand) and  $F^-$  (as representative of anions),  $Cu^{2+}$  and  $Fe^{3+}$  (as representatives of cations).
